# Supplementary material for: Recommendations for Diagnosis and Treatment of Lumbosacral Radicular Pain: A Systematic Review of Clinical Practice Guidelines
Source: MDPI journal article supplement (doi:10.3390/jcm10112482), 2021-06-03
Supplement: s1 [file s1]

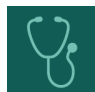

## Supplementary Materials

**Table S4.** Diagnostic Recommendations from guidelines for lumbar radicular pain.

| Physical examination      | Guideline*                                    | Specifications                                                                                                                                                                                           | Consistency       | Clinical Inference |
|---------------------------|-----------------------------------------------|----------------------------------------------------------------------------------------------------------------------------------------------------------------------------------------------------------|-------------------|--------------------|
| Femoral stretch test      | NASS<br>NBPN<br>PARM                          | Insufficient evidence for recommendation<br>Suggested<br>Suggested                                                                                                                                       | inconsistent      | none               |
| Straight leg test         | NASS<br>PARM<br>IHM<br>NHG<br>ACP-APS<br>NBPN | Recommended<br>Recommended<br>Strong recommendation<br>Important to do<br>Should be done<br>Recommended                                                                                                  | Consistent        | Should do          |
| Crossed straight leg test | NASS<br>PARM<br>IHM<br>NHG<br>NBPN            | Recommended<br>Recommended<br>Strong recommendation, high specificity and low sensibility<br>Important to do<br>Recommended                                                                              | consistent        | Should do          |
| Muscle testing            | NASS<br>PARM<br>IHM<br>NHG                    | Recommended<br>Suggested: knee extension, foot dorsi and plantarflexion, toe dorsiflexion<br>Recommended; foot plantar and dorsiflexion, knee extension strength, toes dorsal flexion<br>Important to do | Common/consistent | Should/could do    |

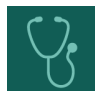

|                                      |                                       |                                                                                                                                                         |              |           |
|--------------------------------------|---------------------------------------|---------------------------------------------------------------------------------------------------------------------------------------------------------|--------------|-----------|
|                                      | ACP-APS<br>NBP                        | should be done; knee, great toe and foot dorsiflexion<br>Strong recommendation                                                                          |              |           |
| Sensory testing                      | NASS<br>PARM<br>IHM<br>ACP-APS<br>NBP | Suggested; foot sensibility<br>Recommended<br>Should be carefully considered; foot<br>Should be done; distribution of sensory symptoms<br>Weak evidence | Common       | Could do  |
| Reflex tests (ankle and knee tendon) | PARM<br>NBP<br>ACP-APS<br>NASS        | Suggested<br>Weak evidence<br>Recommended<br>insufficient evidence to make a recommendation                                                             | Inconsistent | None      |
| mapping pain distribution            | PARM<br>IHM                           | Recommended<br>Strong recommendation                                                                                                                    | Consistent   | Should do |
| Slump test                           | PARM<br>NASS                          | Suggested<br>Insufficient evidence to make a recommendation                                                                                             | inconsistent | None      |
| Wasserman test                       | PARM<br>IHM                           | Suggested<br>Should be carefully considered                                                                                                             | Consistent   | Could do  |
| Steppage                             | PARM<br>IHM                           | Recommended; Immediate referral for surgical evaluation<br>Recommended; requires immediate surgical evaluation                                          | Consistent   | Should do |



|                                                                                                |             |                                                                                               |            |           |
|------------------------------------------------------------------------------------------------|-------------|-----------------------------------------------------------------------------------------------|------------|-----------|
| Congruence of signs and symptoms                                                               | PARM        | Recommended                                                                                   | Consistent | Should do |
|                                                                                                | IHM         | Strong recommendation                                                                         |            |           |
| Diagnostics                                                                                    |             |                                                                                               |            |           |
| Imaging                                                                                        |             |                                                                                               |            |           |
| <i>Routinely offering imaging in primary care or absent of red flags</i>                       | KCE         | Do not offer                                                                                  | Consistent | Do not do |
|                                                                                                | ICSI        | Should not routinely recommend                                                                |            |           |
|                                                                                                | NICE        | Do not offer In a non-specialist setting, consider in specialist settings                     |            |           |
|                                                                                                | ACOE<br>M   | Routine CT not recommended                                                                    |            |           |
|                                                                                                | CCGI        | Avoid unless serious underlying pathology suspected                                           |            |           |
|                                                                                                | ACR<br>NBPN | CT/MRI/X-ray/X-ray myelography usually not appropriate if no prior management<br>Do not offer |            |           |
|                                                                                                |             |                                                                                               |            |           |
| <i>Computed Tomography (CT)/ Magnetic resonance imaging (MRI) routinely in first 4–6 weeks</i> | ICSI        | Should not routinely recommend                                                                | Consistent | Do not do |
|                                                                                                | ACOE<br>M   | Not recommended                                                                               |            |           |
|                                                                                                | NHG         | advice against in primary care                                                                |            |           |
|                                                                                                | PRAM        | Not recommended unless highly painful sciatica or progressive motor deficit                   |            |           |
|                                                                                                | IHM<br>NBPN | Not recommended if no highly-painful sciatica or progressive motor deficit<br>Do not offer    |            |           |
|                                                                                                |             |                                                                                               |            |           |



*CT when history and physical examination findings consistent with disc herniation, after 4 – 6 weeks of low back pain if surgery is considered, severe or progressive neurologic signs and symptoms present*

NASS

CT/CT myelography recommended

Consistent Should do

VA/Do  
d

Recommended

TOP

If MRI is contraindicated

PRAM

Strongly endorsed

ACOE

Recommended

M

IHM

Recommended

ACP-

Only if patients are potential candidates for surgery or epidural steroid injection

APS

NBPN

If MRI is contraindicated

ACR

Usually appropriate when underlying diseases present

May be appropriate when surgery or intervention candidate

*MRI when history and physical examination findings consistent with disc herniation, radiculopathy persists after six week, if surgery is considered, severe or progressive neurologic signs and symptoms present, where an epidural glucocorticosteroid injection is being considered*

NASS

Recommended

Common Should do

VA/Do  
D

Recommended

TOP

Consider



|        |         |                                                                                     |              |      |
|--------|---------|-------------------------------------------------------------------------------------|--------------|------|
|        | NBHD    | Only when recent lumbar nerve root lesions after careful consideration              |              |      |
|        | EG      | Recommend for evaluation of radicular symptoms                                      |              |      |
|        | PRAM    | Strongly endorsed                                                                   |              |      |
|        | ACOE    | Moderately recommended                                                              |              |      |
|        | M       |                                                                                     |              |      |
|        | IHM     | Recommended                                                                         |              |      |
|        | ACP-APS | Only if patients are potential candidates for surgery or epidural steroid injection |              |      |
|        | UMHS    | May be reasonable to perform                                                        |              |      |
|        | NBPN    | Recommended, if severe persistent symptoms and referral to surgery is considered    |              |      |
|        | ACR     | Usually appropriate when underlying diseases present                                |              |      |
|        |         | May be appropriate when surgery or intervention candidate                           |              |      |
|        | ACP     | suggested immediately when severe neurologic deficits                               |              |      |
| Others |         |                                                                                     |              |      |
| EMG    | EG      | Not established                                                                     | Inconsistent | None |
|        | PRAM    | Not recommend in the first four weeks of low back pain                              |              |      |
|        | ACOE    | Recommended where CT or MRI is equivocal                                            |              |      |
|        | M       | and ongoing pain                                                                    |              |      |
|        |         | Not recommended when no significant leg pain or numbness                            |              |      |
|        | IHM     | Not recommended in first 4 weeks                                                    |              |      |
|        | UMHS    | Should be performed If no improvement at $\geq 3$ weeks and MRI not diagnostic      |              |      |



|                                                            |         |                                                                                           |              |      |
|------------------------------------------------------------|---------|-------------------------------------------------------------------------------------------|--------------|------|
| <i>Sensory nerve somatosensory evoked potentials (SEP)</i> | NASS    | Suggested as an adjunct to cross-sectional imaging                                        | Inconsistent | None |
|                                                            | DLE-DWC | Not recommended to identify radiculopathy                                                 |              |      |
|                                                            | ACOE M  | Moderately not recommended                                                                | Inconsistent | None |
|                                                            | DLE-DWC | May be indicated when unremitting pain > 3 months and non-invasive imaging not diagnostic |              |      |
| <i>Discography</i>                                         | NBPN    | Not recommended (do not contribute to diagnostic accuracy)                                |              |      |
|                                                            | APS     | no recommendation                                                                         | Inconsistent | None |
|                                                            | ACOE M  | not recommended                                                                           |              |      |
| <i>Diagnostic medial branch block</i>                      |         |                                                                                           |              |      |

\* Table 1 provides the extensive names of the included guidelines.

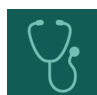

**Table S5.** Therapeutic recommendations from guidelines for lumbar radicular pain.

| Non-Invasive Treatment                                                   | Guide-line* | Specification                                                         | Consistency  | Clinical Inference |
|--------------------------------------------------------------------------|-------------|-----------------------------------------------------------------------|--------------|--------------------|
| Bed rest                                                                 | ACOE M      | Not recommended                                                       | Inconsistent | None               |
|                                                                          | PARM        | Not recommended (except for 2-4 days in severe cases)                 |              |                    |
|                                                                          | IHM         | Better not do, except 2-4 days in case of major sciatica              |              |                    |
|                                                                          | NHG         | Can be considered for few days                                        |              |                    |
|                                                                          | NBPM        | Not recommended, unless to relieve pain                               |              |                    |
| Physical activity                                                        | NBHD        | Consider encouraging                                                  | Common       | Should do          |
|                                                                          | PARM        | Recommends remaining physically active                                |              |                    |
|                                                                          | IHM         | Recommend continuing usual everyday life activities                   |              |                    |
|                                                                          | ACP-APS     | Advice to remain active                                               |              |                    |
|                                                                          | NICE        | Provide, promote and facilitate                                       |              |                    |
|                                                                          | NHG         | Advice dosed physical activity                                        |              |                    |
|                                                                          | NBPN        | Should be encouraged                                                  |              |                    |
| Educational care                                                         | NICE        | Provide information on the nature sciatica                            | Consistent   | Should do          |
|                                                                          | ICSI        | Should receive                                                        |              |                    |
|                                                                          | NHG         | Discuss the condition                                                 |              |                    |
|                                                                          | ACP-APS     | Provide                                                               |              |                    |
|                                                                          | NBPN        | Provide information on the nature sciatica                            |              |                    |
|                                                                          |             |                                                                       |              |                    |
| Multidisciplinary approach/rehabilitation program/ Psychological therapy | NICE        | Consider psychological therapy as part of a treatment package         | Common       | Could do           |
|                                                                          | KCE         | Consider                                                              |              |                    |
|                                                                          | UMHS        | In patient at risk for chronic disability at 6 weeks and disabled     |              |                    |
|                                                                          | NBPN        | Consider when risk of becoming chronic and psycho-social risk factors |              |                    |
| Alternative medicine<br><i>Acupuncture</i>                               | ICSI        | Should be considered                                                  | Inconsistent | None               |
|                                                                          | PARM        | Recommended in acute pain                                             |              |                    |
|                                                                          | ACOE M      | Not recommended                                                       |              |                    |
|                                                                          | IHM         | Not effective                                                         |              |                    |
|                                                                          | NICE        | Do not offer                                                          |              |                    |
|                                                                          | KIOM        | Recommended                                                           |              |                    |
|                                                                          | NBPN        | Not recommended                                                       |              |                    |
|                                                                          |             |                                                                       |              |                    |
| Manual therapies                                                         |             |                                                                       |              |                    |

|                                                         |                                      |                                                                                                                            |              |           |                 |              |      |
|---------------------------------------------------------|--------------------------------------|----------------------------------------------------------------------------------------------------------------------------|--------------|-----------|-----------------|--------------|------|
| <i>traction</i>                                         | NASS                                 | Insufficient evidence to recommend                                                                                         | Inconsistent | None      |                 |              |      |
|                                                         | KCE                                  | Do not offer                                                                                                               |              |           |                 |              |      |
|                                                         | PRAM                                 | Not recommended                                                                                                            |              |           |                 |              |      |
|                                                         | ACOE                                 | Moderately not Recommended                                                                                                 |              |           |                 |              |      |
|                                                         | M                                    |                                                                                                                            |              |           |                 |              |      |
|                                                         | DLE-DWC                              | Not recommended                                                                                                            |              |           |                 |              |      |
|                                                         | NICE                                 | Do not offer                                                                                                               |              |           |                 |              |      |
|                                                         | NBPN                                 | Cannot be recommended                                                                                                      |              |           |                 |              |      |
|                                                         | APTA                                 | Uncertain, a subgroup will benefit                                                                                         |              |           |                 |              |      |
| <i>manipulation/mobilisation/soft-tissue techniques</i> | NASS                                 | Option for symptomatic relief.                                                                                             | Inconsistent | None      |                 |              |      |
|                                                         |                                      | No evidence for improve functional outcomes                                                                                |              |           |                 |              |      |
|                                                         | KCE                                  | Consider                                                                                                                   |              |           |                 |              |      |
|                                                         | ICSI                                 | Should be considered                                                                                                       |              |           |                 |              |      |
|                                                         | NBHD                                 | Consider joint mobilization                                                                                                |              |           |                 |              |      |
|                                                         | PARM                                 | Suggested in acute pain                                                                                                    |              |           |                 |              |      |
|                                                         | ACOE                                 | Recommended when no neurological deficit                                                                                   |              |           |                 |              |      |
|                                                         | M                                    |                                                                                                                            |              |           |                 |              |      |
|                                                         | DLE-DWC                              | Generally accepted and well established intervention                                                                       |              |           |                 |              |      |
|                                                         | IHM                                  | Contraindicated                                                                                                            |              |           |                 |              |      |
|                                                         | NICE                                 | Consider only as part of a treatment package                                                                               |              |           |                 |              |      |
|                                                         | NHG                                  | Not recommended                                                                                                            |              |           |                 |              |      |
|                                                         | CCGI                                 | Conditionally recommended > 3 months pain                                                                                  |              |           |                 |              |      |
|                                                         | NBPN                                 | Manipulation should not be used in the acute phase, could be considered as short-term pain relief when persistent symptoms |              |           |                 |              |      |
|                                                         | APTA                                 | Should consider                                                                                                            |              |           |                 |              |      |
|                                                         | <i>Message</i>                       | PRAM                                                                                                                       |              |           | Not recommended | Inconsistent | None |
|                                                         |                                      | ACOE                                                                                                                       |              |           | Could do        |              |      |
|                                                         |                                      | M                                                                                                                          |              |           |                 |              |      |
| IHM                                                     |                                      | Do not do                                                                                                                  |              |           |                 |              |      |
| NBPN                                                    |                                      | Not recommended                                                                                                            |              |           |                 |              |      |
| Devices<br>(e.g. belts, corset, foot orthotics etc.)    | NICE                                 | Do not offer belts, corsets, foot orthotics, rocker sole shoes                                                             | Consistent   | Do not do |                 |              |      |
|                                                         | KCE                                  | Do not offer belts or corsets, foot orthics, rocker sole shoes                                                             |              |           |                 |              |      |
|                                                         | ACOE                                 | Shoe insoles and lifts are not recommended                                                                                 |              |           |                 |              |      |
|                                                         | M                                    |                                                                                                                            |              |           |                 |              |      |
|                                                         | ACOE                                 | Kinesiotaping and taping are not recommended                                                                               |              |           |                 |              |      |
|                                                         | M                                    |                                                                                                                            |              |           |                 |              |      |
| NBPN                                                    | Belts and corset are not recommended |                                                                                                                            |              |           |                 |              |      |
| Exercise/physical therapies                             | KCE                                  | Consider an exercise program                                                                                               | Consistent   | Could do  |                 |              |      |
|                                                         | ACOE                                 | Moderately Recommended                                                                                                     |              |           |                 |              |      |
|                                                         | M                                    |                                                                                                                            |              |           |                 |              |      |



|                                               |      |                                                                            |              |           |
|-----------------------------------------------|------|----------------------------------------------------------------------------|--------------|-----------|
|                                               | NBHD | Weak/conditional recommendation                                            |              |           |
|                                               | CCGI | Conditional recommendation for patients with chronic (> 3 months) leg pain |              |           |
|                                               | NBPN | Can be used as a tool to activate inactive patients                        |              |           |
|                                               | APTA | Can consider flexion exercises                                             |              |           |
| Electrotherapies                              |      |                                                                            |              |           |
| TENS/PENS/interferential therapy              | NICE | Do not offer TENS/PENS/interferential therapy                              | Consistent   | Do not do |
|                                               | KCE  | Do not offer TENS/PENS/interferential therapy                              |              |           |
|                                               | PRAM | TENS not recommended                                                       |              |           |
|                                               | ACOE | TENS/PENS generally not recommended, only recommended for select use       |              |           |
|                                               | M    |                                                                            |              |           |
|                                               | IHM  | TENS not useful                                                            |              |           |
|                                               | NBPN | Not recommended                                                            |              |           |
| Therapeutic ultrasound                        | KCE  | Do not do                                                                  | Inconsistent | None      |
|                                               | PARM | Recommended                                                                |              |           |
|                                               | NICE | Do not offer                                                               |              |           |
| Heat/Cold/Infrared therapies                  | ICSI | Heat and Cold therapies may be used for pain relief                        | Inconsistent | None      |
|                                               | PRAM | Heat not recommended in acute pain                                         |              |           |
|                                               | UMHS | Heat may be reasonable to perform in initial visit                         |              |           |
|                                               | ACOE |                                                                            |              |           |
|                                               | M    | No recommendation for infrared therapy                                     |              |           |
| <b>Pharmacological interventions</b>          |      |                                                                            |              |           |
| Paracetamol                                   | KCE  | Do not routinely offer                                                     | Inconsistent | None      |
|                                               | PARM | Recommended in acute pain                                                  |              |           |
|                                               | ACOE |                                                                            |              |           |
|                                               | M    | Recommended when NSAIDs are contraindicated                                |              |           |
|                                               | IHM  | Could be useful to reduce pain                                             |              |           |
|                                               | UMHS | Opinion of expert panel                                                    |              |           |
|                                               | NHG  | Offer as first choice                                                      |              |           |
|                                               | NBPN | Start with                                                                 |              |           |
| Non-steroidal anti-inflammatory drugs (NSAID) | KCE  | Consider                                                                   | Inconsistent | None      |
|                                               | ICSI | May be used considering the side effect suggested for acute pain           |              |           |
|                                               | PARM |                                                                            |              |           |
|                                               | ACOE | Strongly recommended                                                       |              |           |
|                                               | M    |                                                                            |              |           |
|                                               | IHM  | Could be useful to reduce pain                                             |              |           |
|                                               | NHG  | Give as step 2 only if Paracetamol is effective                            |              |           |
|                                               | NBPN | Do not use (evidence of no effect and risk of side-effects)                |              |           |
| Opioids                                       | NICE | Consider Tramadol only for acute rescue therapy                            | Inconsistent | None      |
|                                               |      | Do not start Tramadol for long term use in non-specialist setting,         |              |           |
|                                               |      | Do not start Morphine in non-specialist setting                            |              |           |
|                                               | KCE  | Do not routinely offer for managing chronic pain                           |              |           |

|                       |         |                                                                                                                                            |              |      |
|-----------------------|---------|--------------------------------------------------------------------------------------------------------------------------------------------|--------------|------|
|                       | PARM    | Light opioid recommended in acute pain in combination with paracetamol as alternative when NSAIDs or paracetamol alone do not control pain |              |      |
|                       | IHM     | Strong recommendation. Could be useful to reduce pain                                                                                      |              |      |
|                       | NHG     | Consider strong opioids like Morphine/ Fentanyl in chronic pain                                                                            |              |      |
|                       | NBPN    | Consider Tramadol for acute strong pain, but only for short periods                                                                        |              |      |
| Paracetamol + opioids | IHM     | Can be an effective alternative when NSAIDs or PCM alone do not control pain                                                               | Inconsistent | None |
|                       | NHG     | Not recommended                                                                                                                            |              |      |
| Anti-epilepticum      | NBPN    | Start if no satisfactory effect with paracetamol alone                                                                                     |              |      |
|                       | KCE     | Do not offer                                                                                                                               | Inconsistent | None |
|                       | VA/Do d | No recommendation for or against                                                                                                           |              |      |
|                       | PARM    | Recommended in acute pain                                                                                                                  |              |      |
|                       | ACOE M  | Not recommended for chronic radicular pain syndromes                                                                                       |              |      |
|                       | NASS    | insufficient evidence to make a recommendation for or against Gabapentin                                                                   |              |      |
|                       | NICE    | Offer gabapentin or Pregabalin                                                                                                             |              |      |
|                       |         | Do not start in non-specialist setting: levetiracetam, lamotrigine, topiramate, oxcarbazepine, lacosamide                                  |              |      |
|                       | NHG     | Consider Gabapentine besides low dose of TCA, if TCA is not effective, or has side effect of is contra indicated                           |              |      |
| Muscle relaxants      | KCE     | Do not offer                                                                                                                               | Inconsistent | None |
|                       | ICSI    | May be used as a short-term option                                                                                                         |              |      |
|                       | PARM    | Recommended in acute pain                                                                                                                  |              |      |
|                       | ACOE M  | Recommended for acute radicular pain                                                                                                       |              |      |
|                       | IHM     | Could be useful to reduce pain                                                                                                             |              |      |
|                       | NHG     | Benzodiazepines are not recommended                                                                                                        |              |      |
|                       | NBPN    | Evaluate but only for a short period                                                                                                       |              |      |
| Antidepressants       | NASS    | Insufficient evidence for Amitriptyline                                                                                                    | Inconsistent | None |
|                       | NICE    | Offer amitriptyline or duloxetine                                                                                                          |              |      |
|                       |         | Do not start venlafaxine in non-specialist setting                                                                                         |              |      |
|                       | KCE     | Do not offer SSRI, TCA or SNRI                                                                                                             |              |      |
|                       | ACOE M  | SSRI is not recommended.                                                                                                                   |              |      |
|                       | NHG     | No recommendation for TCA/SNRI                                                                                                             |              |      |
|                       |         | TCA/SNRI could be considered                                                                                                               |              |      |
| Corticosteroids       | VA/Do d | Recommended against offering                                                                                                               | Inconsistent | None |

|                     |         |                                                                                                                                                            |              |           |
|---------------------|---------|------------------------------------------------------------------------------------------------------------------------------------------------------------|--------------|-----------|
|                     | PARM    | Recommended short-term for patients with acute pain                                                                                                        |              |           |
|                     | ACOE M  | Recommended for treatment of acute and subacute radicular pain<br>Not recommended for treatment of chronic radicular pain                                  |              |           |
|                     | DLE-DWC | Not generally recommended                                                                                                                                  |              |           |
|                     | NHG     | Not recommended                                                                                                                                            |              |           |
|                     | ACP-APS | Not recommended                                                                                                                                            |              |           |
| Antibiotics         | KCE     | Do not offer                                                                                                                                               | Inconsistent | None      |
|                     | ACOE M  | No recommendation                                                                                                                                          |              |           |
| Cannabis            | NICE    | Do not start in non-specialist settings                                                                                                                    | Consistent   | Do not do |
|                     | NHG     | Not recommended in primary care                                                                                                                            |              |           |
| Invasive Treatments |         |                                                                                                                                                            |              |           |
| Surgery             | NASS    | Percutaneous/Automated discectomy may be suggested                                                                                                         | Common       | Could do  |
|                     | APS     | Consider offering discectomy                                                                                                                               |              |           |
|                     | NHG     | Consider after 12 weeks of conservative therapy                                                                                                            |              |           |
|                     | DLE-DWC | Discectomy/Laminectomy/Foramenotomy/Facetectomy/Chemonucleolysis are indicated                                                                             |              |           |
|                     | IHM     | Discectomy effective when no improvement with conservative therapy<br>laser/Percutaneous discectomy must be considered experimental                        |              |           |
|                     | ACOE M  | Lumbar discectomy is moderately recommended after 4 to 6 weeks to speed recovery<br>Automated percutaneous discectomy and Laser discectomy not recommended |              |           |
|                     | NBPN    | Acute only for cauda equina syndrome<br>Discectomy can be considered after 12 weeks (preferably before 8 months) when persistent severe symptoms           |              |           |
| Injection therapies | NICE    | Consider acute and severe sciatica                                                                                                                         | Inconsistent | None      |
| Epidural injections | NASS    | Transforaminal epidural steroid injection are recommended<br>Interlaminar epidural steroid injections may be considered                                    |              |           |
|                     | KCE     | Consider in (sub)acute (at least 2-3 weeks) and severe pain                                                                                                |              |           |
|                     | VA/Do d | Suggested for the very short-term effect                                                                                                                   |              |           |

|          |      |                                                                                                                                                                                                        |                      |
|----------|------|--------------------------------------------------------------------------------------------------------------------------------------------------------------------------------------------------------|----------------------|
|          |      | Recommended against offering for the long-term reduction of pain                                                                                                                                       |                      |
|          | ICSI | May be used as an adjunct treatment to assist with short-term pain relief                                                                                                                              |                      |
|          | NBHD | Weak/conditional recommendation against extra-foraminal glucocorticoid injection                                                                                                                       |                      |
|          | PRAM | Recommended                                                                                                                                                                                            |                      |
|          | ACOE |                                                                                                                                                                                                        |                      |
|          | M    | Recommended as an option                                                                                                                                                                               |                      |
|          | ACP  | Weak recommendation                                                                                                                                                                                    |                      |
|          | NHG  | Not recommended in first line                                                                                                                                                                          |                      |
|          | NBPN | Can be tried in awaiting surgery                                                                                                                                                                       |                      |
|          | APS  | Consider offering when prolapsed lumbar disc                                                                                                                                                           |                      |
| Referral |      |                                                                                                                                                                                                        | Consistent should do |
|          | PRAM | Immediate referral for surgical evaluation when step-<br>page<br>To neurophysiological when etiological/ level diagnosis are uncertain,<br>Prognostication information required or monitor objectively |                      |
|          | IHM  | Surgical evaluation < 1 month when neurological symptoms worsening<br>Or > 1 month when sciatica is important and disabling                                                                            |                      |
|          | NHG  | Neurologist evaluation when 1-3 months sciatica<br>Neurologist evaluation when 1-3 months sciatica<br>1-2 day if severe pain despite maximal medication                                                |                      |

\* Table 1 provides the extensive names of the included guidelines.
